# Supplementary material for: Ethanol Diverts Early Neuronal Differentiation Trajectory of Embryonic Stem Cells by Disrupting the Balance of Lineage Specifiers
Source: PLoS One. 2013 May 28;8(5):e63794. doi: 10.1371/journal.pone.0063794 (PMC3665827; doi:10.1371/journal.pone.0063794)
Supplement: Table S1 — List of primers and probes used in qRT-PCR. (XLS) [file pone.0063794.s003.xls]

## Sheet: Sheet1
Supporting Information Table 1. Genes and Primers
				Forward Primer						Reverse Primer
No	Gene Symbol	Gene description	Accession No	Length	Position	Tm	%GC	Sequence	Probe	Length	Position	Tm	%GC	Sequence	Probe	Amplicon Size
1	18S	18S rRNA	X00686.1	20	1617 - 1636	60	45	gcaattattccccatgaacg	48	20	1665 - 1684	59	50	gggacttaatcaacgcaagc	48	68
2	Actb	actin, beta	NM_007393.3	22	1014 - 1035	60	50	ggatgcagaaggagattactgc	63	20	1088 - 1107	59	55	ccaccgatccacacagagta	63	94
3	Ascl1	achaete-scute complex homolog 1 (Drosophila)	NM_008553.4	20	1282 - 1301	60	50	tctcctgggaatggactttg	74	21	1329 - 1349	59	48	cgttggcgagaaacactaaag	74	68
4	Ascl2	achaete-scute complex homolog 2; Mash2	NM_008554.3	19	1015 - 1033	60	58	gagagctaagcccgatgga	17	19	1106 - 1124	59	63	aggtccaccaggagtcacc	17	110
5	Bmp8b	bone morphogenetic protein 8b	NM_007559.4	22	1197 - 1218	59	50	ctgtatgaactccaccaaccac	81	20	1248 - 1267	59	50	tggggatgatatctggcttc	81	71
6	T	T-box transcription factor, brachyury	NM_009309.2	20	1122 - 1141	60	60	cagcccacctactggctcta	100	18	1176 - 1193	59	61	gagcctggggtgatggta	100	72
7	Cebpb	CCAAT/enhancer-binding protein beta	NM_009883.3	20	288 - 307	60	55	atcgacttcagcccctacct	55	18	374 - 391	60	61	tagtcgtcggcgaagagg	55	104
8	Cebpg	CCAAT/enhancer binding protein gamma	NM_009884.3	20	3191 - 3210	59	55	acgagttctgggcatagagg	21	20	3231 - 3250	60	55	tgacccaaagggctagacag	21	60
9	Cxcl12	C-X-C motif ligand 12, or SDF-1, chemokine stromal-cell-derived factor 1	NM_021704.2	20	255 - 274	59	50	ctgtgcccttcagattgttg	41	20	302 - 321	59	40	taatttcgggtcaatgcaca	41	67
10	Dkk1	dickkopf homolog 1	NM_010051.3	20	512 - 531	59	45	ccgggaactactgcaaaaat	76	21	585 - 605	59	38	ccaaggttttcaatgatgctt	76	94
11	Dmrt1	doublesex and mab-3 related transcription factor 1	NM_015826.5	19	450 - 468	59	53	agaagtgcagcctgattgc	40	22	524 - 545	59	50	ggctgatacccagttcttcttc	40	96
12	Dppa5a	developmental pluripotency associated 5A; Esg1 -embryonal stem cell-specific gene 1	NM_025274.3	20	319 - 338	59	45	cggctctcaaaacaacaaga	102	20	401 - 420	59	55	gattcctccagcttcagcac	102	102
13	E2f1	E2F transcription factor 1	NM_007913.5	21	643 - 663	60	43	tgccaagaagtccaagaatca	5	20	697 - 716	59	50	cttcaagccgcttaccaatc	5	74
14	Egr1	early growth response 1	NM_007913.5	20	560 - 579	59	55	cctatgagcacctgaccaca	22	20	630 - 649	60	50	tcgtttggctgggataactc	22	90
15	Esrrb	estrogen related receptor, beta	NM_011934.4	21	1081 - 1101	60	48	ggagcttgtgttcctcatcaa	60	20	1133 - 1152	59	55	atctggtccccaagtgtcag	60	72
16	Fgf11	fibroblast growth factor 11	NM_010198.1	20	555 - 574	59	55	ccgagtcaagaagaccaagg	10	19	614 - 632	59	58	agagaaggctcccggtaca	10	78
17	Fgf4	fibroblast growth factor 4	NM_010202.5	18	535 - 552	60	61	gcaagctcttcggtgtgc	29	20	605 - 624	60	55	cgtaggattcgtaggcgttg	29	90
18	Fos	FBJ osteosarcoma oncogene	NM_010234.2	21	210 - 230	59	57	gggacagcctttcctactacc	67	20	277 - 296	60	50	gatctgcgcaaaagtcctgt	67	87
19	Foxd3	forkhead box D3	NM_010425.3	19	680 - 698	60	58	aggtctgaccccgaacaag	64	20	723 - 742	59	55	agcgcgatgtaagagtaggg	64	63
20	Foxp1	forkhead box P1	NM_053202.1	20	1779 - 1798	60	55	ctgcacacctctcaatgcag	102	22	1830 - 1851	59	55	ggaagcggtagtgtacagaggt	102	73
21	Gabpa	GA repeat binding protein, alpha	NM_008065.2	20	1152 - 1171	60	50	cggggagaaattctttggag	50	19	1194 - 1212	59	47	cttggctggccaaaacata	50	61
22	Gadd45a	growth arrest and DNA-damage-inducible 45 alpha	NM_007836.1	20	190 - 209	59	50	agagcagaagaccgaaagga	69	19	256 - 274	60	58	cgtaatggtgcgctgactc	69	85
23	Gapdh	glyceraldehyde-3-phosphate dehydrogenase	NM_008084.2	19	763 - 781	60	58	tgtccgtcgtggatctgac	80	20	818 - 837	60	55	cctgcttcaccaccttcttg	80	75
24	Gata4	GATA binding protein 4	NM_008092.3	19	1728 - 1746	59	58	actatgggcacagcagctc	58	20	1804 - 1823	60	60	gggacagcttcagagcagac	58	96
25	Gdf3	growth differentiation factor 3	NM_008108.4	18	339 - 356	60	56	tgttcgtgggaacctgct	7	21	394 - 414	60	48	gccatcttggaaaggtttctg	7	76
26	Id1	inhibitor of DNA binding 1	NM_010495.2	18	447 - 464	60	61	gcgagatcagtgccttgg	93	19	539 - 557	59	63	ctcctgaagggctggagtc	93	111
27	Id4	inhibitor of DNA binding 4	NM_031166.2	20	532 - 551	60	55	agggtgacagcattctctgc	92	20	639 - 658	60	50	ccggtggcttgtttctctta	92	127
28	Klf4	Kruppel-like factor 4 (gut)	NM_010637.3	20	1678 - 1697	59	55	ccagatgcagtcacaagtcc	82	20	1757 - 1776	60	55	gaccttcttcccctctttgg	82	99
29	Lhx2	LIM homeobox protein 2	NM_010710.3	27	762 - 788	59	41	gcatctactgcaaagaagactactaca	105	19	837 - 855	60	58	cgcatcaccatctctgagg	105	94
30	Mef2c	myocyte enhancer factor 2C	NM_025282.2	19	1009 - 1027	60	53	atgggcggagatctgacat	40	23	1092 - 1114	60	48	tcttgttcaggttaccaggtgag	40	106
31	Meis1	myeloid ecotropic integration site 1	NM_010789.2	26	653 - 678	60	38	gacgctttaaagagagataaagatgc	103	25	705 - 729	59	32	catttctcaaaaatcagtgctaaga	103	77
32	Myc	myelocytomatosis oncogene	NM_010849.4	20	1337 - 1356	59	55	cctagtgctgcatgaggaga	77	23	1386 - 1408	59	43	tcttcctcatcttcttgctcttc	77	72
33	Mycn	v-myc myelocytomatosis viral related oncogene, neuroblastoma derived	NM_008709.3	20	1045 - 1064	60	60	agcacctccggagaggatac	69	20	1107 - 1126	59	50	ccacatcgatttcctcctct	69	82
34	Nacc1	nucleus accumbens associated 1, BEN and BTB (POZ) domain containing	NM_025788.2	19	1369 - 1387	60	58	tagctgtgtcaccggcatc	31	21	1451 - 1471	59	52	ggcgaagttctggcagtagta	31	103
35	Nanog	transcription factor Nanog, Early embryo specific expression NK-type homeobox protein	NM_028016.2	21	320 - 340	59	48	ttcttgcttacaagggtctgc	110	18	369 - 386	60	61	agaggaagggcgaggaga	110	67
36	Ncoa3	nuclear receptor coactivator 3	NM_008679.3	19	3849 - 3867	59	58	ctggcactgctgtgatgag	3	20	3891 - 3910	59	40	agccatttgggcattaaaga	3	62
37	Nes	nestin	NM_016701.3	20	873 - 892	60	50	ctgcaggccactgaaaagtt	1	23	923 - 945	60	52	tctgactctgtagaccctgcttc	1	73
38	Nfkb2	nuclear factor of kappa light polypeptide gene enhancer in B-cells 2, p49/p100	NM_019408.2	18	401 - 418	60	56	tggaacagcccaaacagc	76	18	458 - 475	59	56	cacctggcaaacctccat	76	75
39	Notch1	Notch gene homolog 1	NM_008714.3	18	5230 - 5247	59	61	ctggaccccatggacatc	80	20	5283 - 5302	59	50	aggatgactgcacacattgc	80	73
40	Nr0b1	nuclear receptor subfamily 0, group B, member 1	NM_007430.4	20	1182 - 1201	59	50	accgtgctctttaacccaga	3	19	1262 - 1280	59	58	ccggatgtgctcagtaagg	3	99
41	Nr2f1	nuclear receptor subfamily 2, group F, member 1; COUP-TF1 - orphan nuclear receptor chicken ovalbumin upstream promoter-transcription-factor 1	NM_010151.2	21	1372 - 1392	59	48	catcgtgctattcacgtcaga	25	19	1467 - 1485	59	53	ttggggtactggcttctca	25	114
42	Nr6a1	nuclear receptor subfamily 6, group A, member 1, transcript variant 1	NM_010264.4	20	339 - 358	60	50	gcaacggtttctgtcaggat	53	25	391 - 415	60	44	gccaagtgttaaactgtcagtctct	53	77
43	Nrip1	nuclear receptor interacting protein 1; Rip140 - receptor interacting protein 140	NM_173440.2	18	117 - 134	59	61	cacggctaacctgggaag	100	20	199 - 218	59	50	tcctgagaacagctctgcaa	100	102
44	Pax6	paired box gene 6	NM_013627.4	20	359 - 378	59	60	gttccctgtcctgtggactc	78	20	400 - 419	59	50	accgcccttggttaaagtct	78	61
45	Pdgfa	platelet derived growth factor alpha	NM_008808.3	18	718 - 735	60	61	gtgcgacctccaacctga	52	21	761 - 781	59	52	ggctcatctcacctcacatct	52	64
46	Pou3f4	POU domain, class 3, transcription factor 4; Brn4 – Brain 4	NM_008901.1	20	736 - 755	60	45	tgcaagctgaaaccgctatt	25	19	779 - 797	59	53	gggcttcctgtggatgaat	25	62
47	Pou5f1	POU domain, class 5, transcription factor 1; Oct4, Oct3/4	NM_013633.2	21	935 - 955	60	57	gaggctacagggacacctttc	6	18	988 - 1005	60	61	gtgccaaagtggggacct	6	71
48	Rpl15	ribosomal protein L15	NM_025586.3	18	610 - 627	59	56	cctggagaaggcgcaata	78	26	702 - 727	59	31	caaataacacctttaagcagaaatga	78	118
49	Rpl35	ribosomal protein L35	NM_025592.3	19	107 - 125	60	53	tggacgatctgaaggtgga	33	21	188 - 208	60	52	cgatagacttgcgaacgactc	33	102
50	Rpl41	ribosomal protein L41	NM_018860.4	19	250 - 268	60	53	tgctgccatcggtaatgag	80	20	315 - 334	60	50	ggttgtaagaaaggcggtca	80	85
51	Rplp2	ribosomal protein, large P2	NM_026020.6	20	108 - 127	59	50	tctcctagcgccaaagacat	105	21	182 - 202	60	52	ccattcagctcactgatgacc	105	95
52	Rps16	ribosomal protein S16	NM_013647.2	20	353 - 372	59	40	caaatttatgccatccgaca	81	20	416 - 435	59	50	tccttcttggaggcttcatc	81	83
53	Rps5	ribosomal protein S5	NM_009095.2	20	51 - 70	60	60	gactgagaagcccagtctgc	5	19	113 - 131	59	58	tgatgtcaggggtctctgc	5	81
54	Rps8	ribosomal protein S8	NM_009098.2	20	18 - 37	60	50	ttagaaaccggaccgtgaag	105	20	117 - 136	59	50	tggtagggttttcgcttacc	105	119
55	Sall4	zinc finger protein SALL4	NM_201395.2	18	232 - 249	59	67	gcagcctcagcagctacc	70	18	292 - 309	59	61	ggggagttcactggagca	70	78
56	Six4	sine oculis homeobox homolog 4	NM_011382.2	20	1536 - 1555	60	50	ggagcattggattctctcca	16	20	1602 - 1621	60	55	cgaagtgcttggggtaactg	16	86
57	Smad1	MAD homolog 1 (Drosophila)	NM_008539.3	18	1117 - 1134	60	56	gcccatggacacgaacat	82	20	1175 - 1194	59	50	tcgtaagcaactgcctgaac	82	78
58	Smarcad1	SWI/SNF-related, matrix-associated actin-dependent regulator of chromatin, subfamily a, containing DEAD/H box 1	NM_007958.1	24	683 - 706	60	33	aaaaattcagcaaagacacagtga	21	21	735 - 755	59	48	gaaggaaggtcatgggattct	21	73
59	Sox1	SRY-box containing gene 1	NM_009233.3	18	2166 - 2183	59	61	gtgacatctgcccccatc	60	19	2207 - 2225	59	63	gaggccagtctggtgtcag	60	60
60	Sox11	SRY-box containing gene 11	NM_009234.6	19	1430 - 1448	59	58	gagctgagcgagatgatcg	20	20	1470 - 1489	59	55	gaacaccaggtcggagaagt	20	60
61	Sox18	SRY-box containing gene 18	NM_009236.2	20	437 - 456	59	55	cgcagtactgagcaagatgc	12	22	544 - 565	60	50	cggtacttgtagttgggatggt	12	129
62	Sox2	SRY-box containing gene 2	NM_011443.3	24	162 - 185	60	33	tccaaaaactaatcacaacaatcg	63	21	214 - 234	59	38	gaagtgcaattgggatgaaaa	63	73
63	Sox3	SRY-box containing gene 3	NM_009237.2	18	1553 - 1570	60	61	cgctggcttctgaccact	106	19	1595 - 1613	60	53	gcaaacaccacagcgattc	106	61
64	Sox4	SRY-box containing gene 4	NM_009238.2	19	1705 - 1723	59	63	ctcgctctcctcgtcctct	63	19	1751 - 1769	59	58	cgtcttcgaactcgtcgtc	63	65
65	Stat3	signal transducer and activator of transcription 3, transcript variant 1	NM_213659.2	21	2491 - 2511	60	48	ggaaataacggtgaaggtgct	18	20	2537 - 2556	59	50	catgtcaaacgtgagcgact	18	66
66	Tcf4	transcription factor 4	NM_011562.2	20	1072 - 1091	60	50	gaaaagttcctccgggtttg	41	20	1122 - 1141	60	55	tccctgttgtagtcggcagt	41	70
67	Tcfcp2l1	transcription factor CP2-like 1	NM_023755.2	20	700 - 719	60	60	ggggactactcggagcatct	53	18	756 - 773	59	56	ttccgatcagctcccttg	53	74
68	Tuba1a	tubulin, alpha 1A	NM_011653.2	18	256 - 273	59	61	ctggaacccacggtcatc	88	21	349 - 369	59	48	gtggccacgagcatagttatt	88	114
69	Uba52	ubiquitin A-52 residue ribosomal protein fusion product 1	NM_019883.3	20	158 - 177	60	55	ccagcagaggctgatattcg	78	20	225 - 244	59	50	tgcaaggtggactctttctg	78	87
70	Zfp281	zinc finger protein 281	NM_177643.4	23	4717 - 4739	59	48	gttgggtacagagacaagtgtga	55	26	4760 - 4785	60	46	cctacagcttaagagatacaggggta	55	69
71	Zfp42	zinc finger protein 42; Rex1, reduced expression protein 1	ENSMUST00000082120	25	232 - 256	59	48	gcctagaactcacagatcttacctg	16	20	287 - 306	59	50	gctttcttctgtgtgcagga	16	75
72	Zfx	zinc finger protein X-linked	NM_011768.2	21	394 - 414	59	43	caacaacaagcaccaaactca	17	24	448 - 471	59	33	cacaacaatttgattaccatccat	17	78
73	Zic1	zinc finger of the cerebellum 1	NM_009573.3	22	1734 - 1755	59	41	aacctcaagatccacaaaagga	7	19	1776 - 1794	60	53	cctcgaactcgcacttgaa	7	61
